# Supplementary material for: From six to eight Π-electron bare rings of group-XIV elements and beyond: can planarity be deciphered from the “quasi-molecules” they embed?
Source: Royal Society of Chemistry journal article supplement (doi:10.1039/d1cp04130d), 2022-01-01
Supplement: d1cp04130d1.pdf [file d1cp04130d1.pdf]

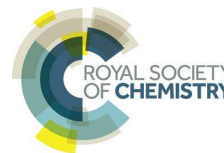

# Journal Name

## ARTICLE TYPE

Cite this: DOI: 10.1039/xxxxxxxxxx

## From Six to Eight $\Pi$ -electron Bare Rings of Group-XIV Elements and Beyond: Can Planarity be Deciphered from the “Quasi-molecules” They Embed?

A.J.C. Varandas,<sup>\*a,b,c</sup>

Received Date

Accepted Date

DOI: 10.1039/xxxxxxxxxx

[www.rsc.org/journalname](http://www.rsc.org/journalname)

## SUPPLEMENTARY INFORMATION

China.

<sup>b</sup> Department of Physics, Universidade Federal do Espírito Santo, 29075-910 Vitória, Brazil.

<sup>c</sup> Department of Chemistry, and Chemistry Centre, University of Coimbra, 3004-535 Coimbra, Portugal; E-mail: [varandas@uc.pt](mailto:varandas@uc.pt)

<sup>a</sup> School of Physics and Physical Engineering, Qufu Normal University, 273165 Qufu,

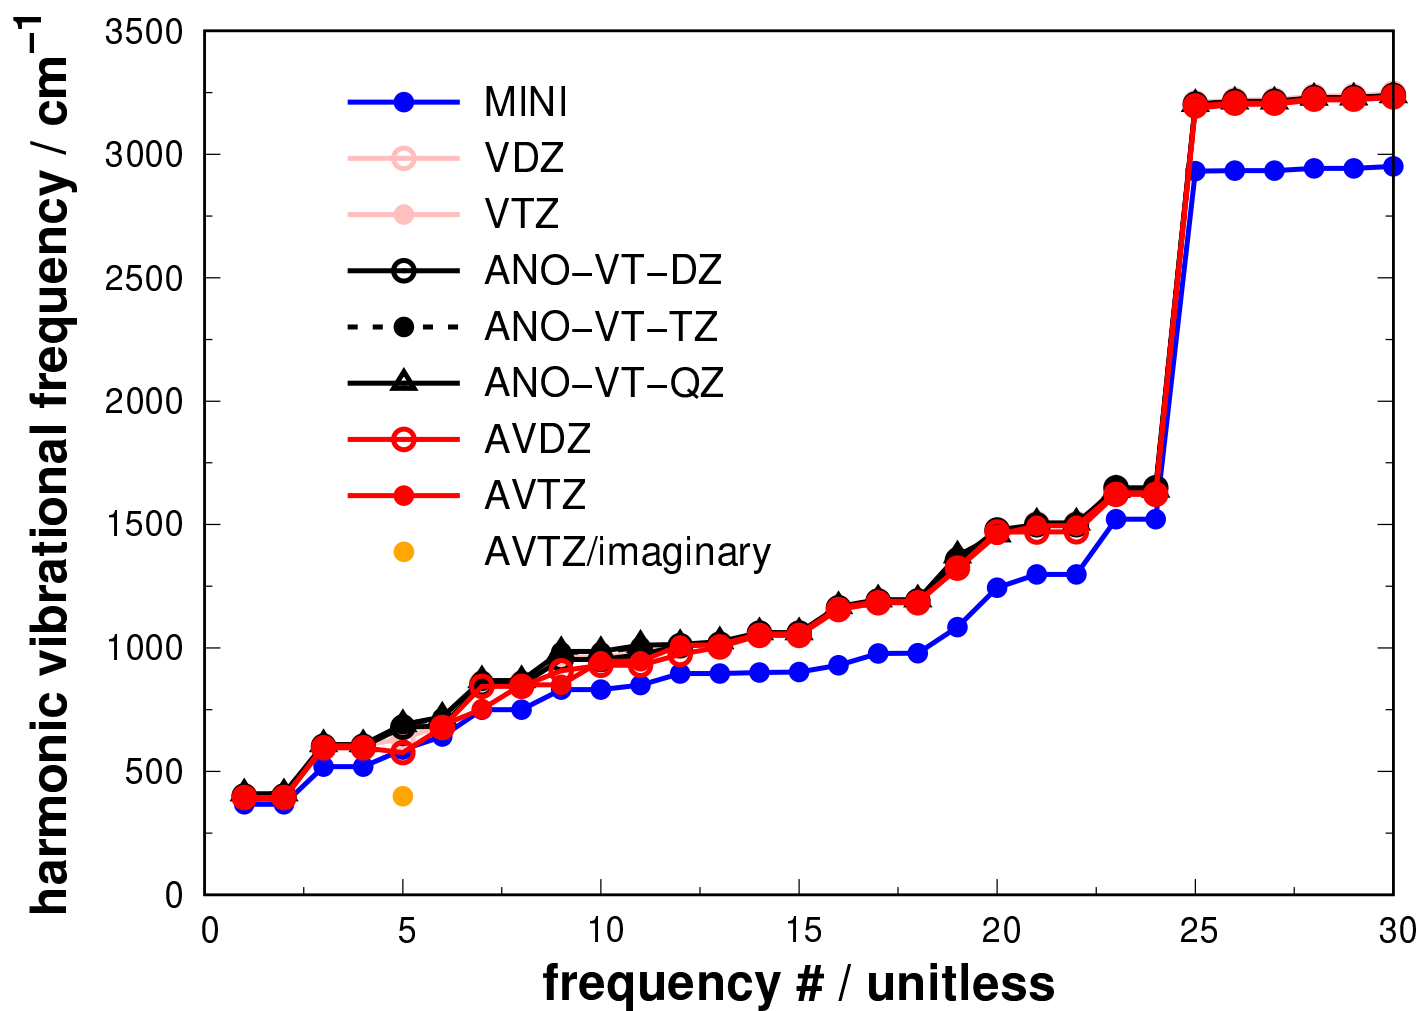

**Fig. 1** Harmonic vibrational frequencies calculated in the present work for benzene at the MP2 level with MINI, VxZ, AVxZ, and ANO-VT-XZ basis sets (see the text).

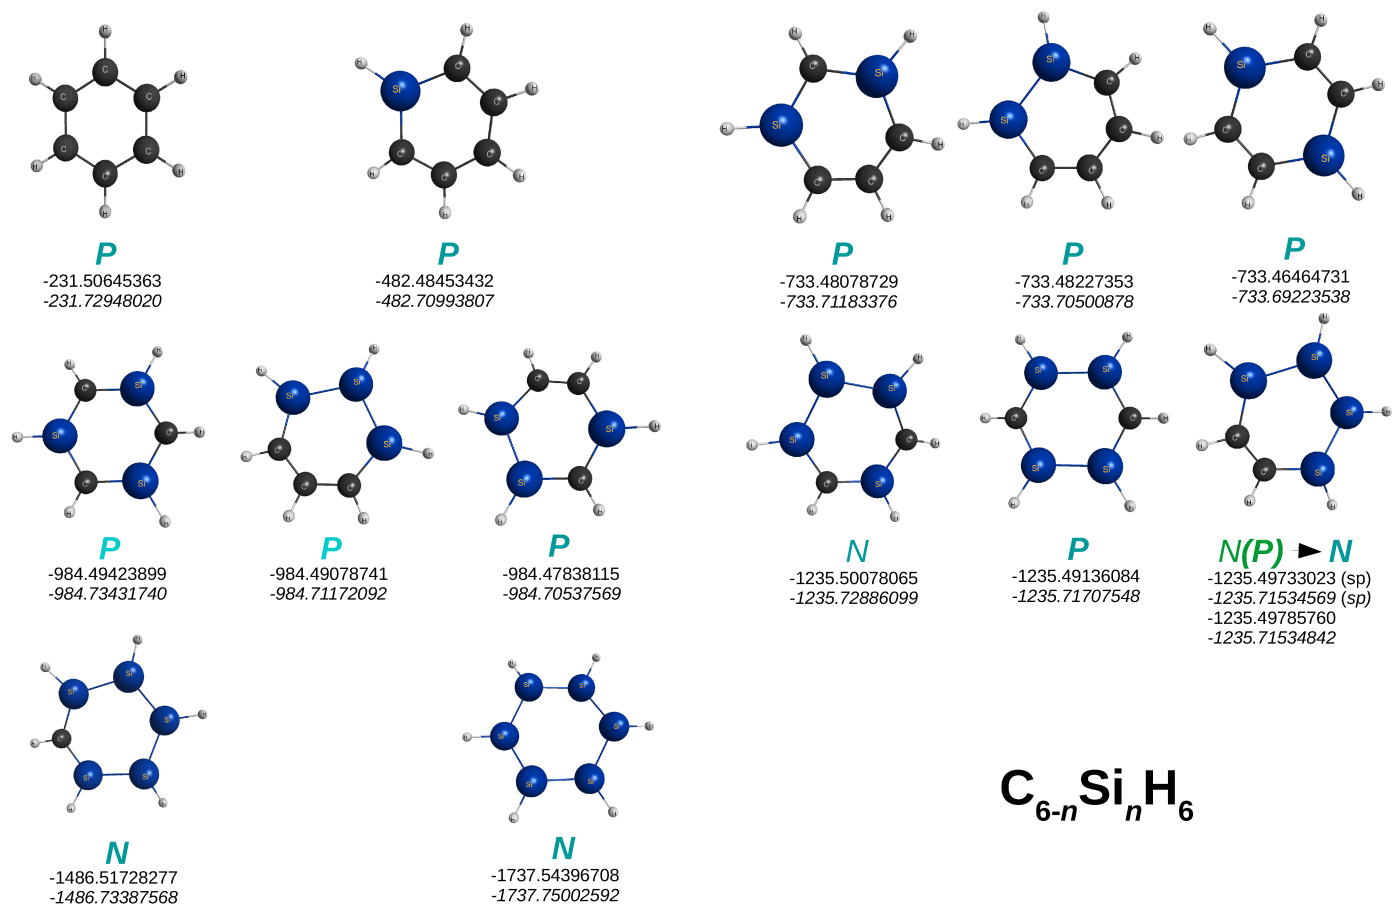

**Fig. 2** Actual optimized structures for benzene and its E-derivatives. The optimized energies (in hartree,  $E_h$ ) here calculated at the MP2/VDZ level of theory are in roman, the MP2/VTZ ones in italic. Signaled by  $N(\mathbf{P}) \rightarrow \mathbf{N}$  is the fact that the indicated structure varies from weakly nonplanar (light-italic N) to nonplanar at MP2/VDZ level of theory when transitioning from the saddle point to the nearby minimum structure. Note that the saddle point structure is perfectly planar even when MP2/V(T+d)Z optimized. Notation as in Figure 1 of the text.

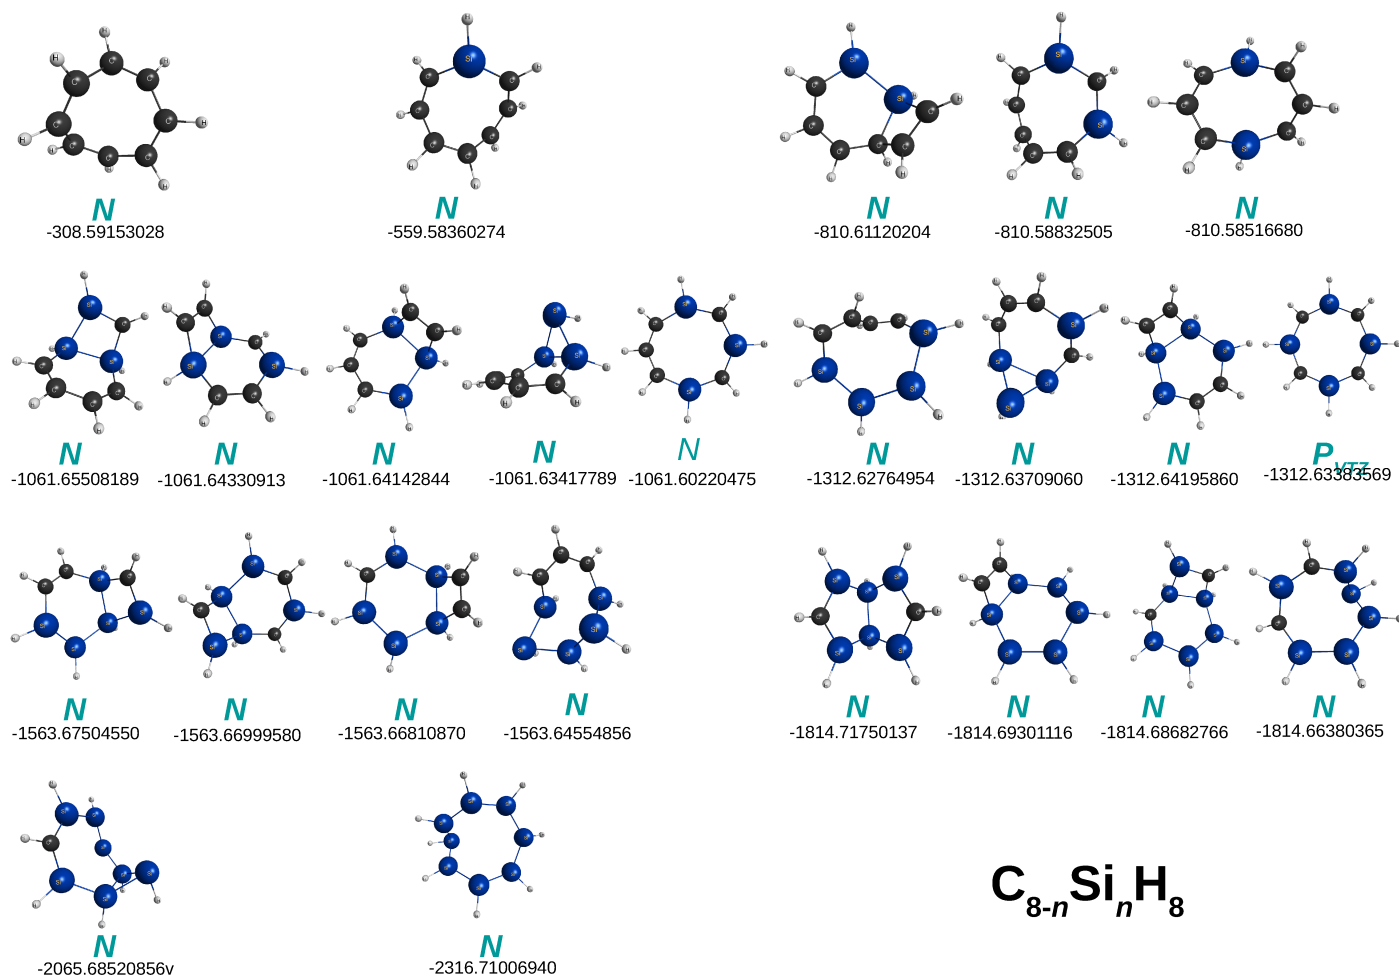

**Fig. 3** Actual optimized structures for COT and its E-derivatives. The optimized energies (in  $E_h$ ) here calculated at the MP2/VTZ level of theory are also indicated. Notation as in Figure 1 of the text.
